# Supplementary material for: Kinetoplastid PPEF phosphatases: Dual acylated proteins expressed in the endomembrane system of Leishmania
Source: PubMed Central journal article supplement (PMC1885993; doi:10.1016/j.molbiopara.2006.11.008), 2007-03
Supplement: mmc1.pdf [file mmc1.pdf]

**Figure S1. Alignment of the kinetoplastid PPEFs with RdgC/PPEF proteins from other eukaryotes**

**Key:** Hs: *Homo sapiens*. Mm: *Mus musculus*. Dm: *Drosophila melanogaster*. Ce: *Caenorhabditis elegans*. Tc: *Trypanosoma cruzi*. Tb: *Trypanosoma brucei*. Lm: *Leishmania major*.

Residues in red correspond to the phosphatase catalytic region. Regions block highlighted in red correspond to residues matching that of the EF-hand consensus motif. Red asterisks highlight residue positions within the EF-hand motif essential for calcium ion coordination. Residues block highlighted in blue correspond to the calmodulin IQ-type motif (X = any residue). Boxed residues indicate distinctive regions of RdgC/PPEFs absent from other PPP enzymes.

|         |                                                                                                                  |                           |                         |
|---------|------------------------------------------------------------------------------------------------------------------|---------------------------|-------------------------|
| HsPPEF2 | -----                                                                                                            |                           |                         |
| MmPPEF  | -----                                                                                                            |                           |                         |
| DmRdgC  | -----                                                                                                            |                           |                         |
| CePPEF  | -----MGCGPSSGRQNPSTELKKSTRATTTTTSSSQRNNDNNQNTSS                                                                  | 44                        |                         |
| TcPPEF  | MGCTNTKESSEKRG---GNASELTK-----GGRVGLT-----GVLAANGLH                                                              | 38                        |                         |
| TbPPEF  | MGCSTSKGDPLRTNKGAGDGAGSLRNP-----PGGRWSQT-----DYPDVG---                                                           | 41                        |                         |
| LmPPEF  | MGCDSSKE---GVASNTASASSRGRNCAEEKGGRRTCNSN---DSTEVKKGKSGASGAH                                                      | 53                        |                         |
|         |                                                                                                                  |                           |                         |
| HsPPEF2 | -----MGSGTSTQHHFAFQNAER-----                                                                                     | 18                        |                         |
| MmPPEF  | -----MGSSSSTQHHFAFQNAEK-----                                                                                     | 18                        |                         |
| DmRdgC  | -----MDEN-----                                                                                                   | 4                         |                         |
| CePPEF  | SSGNKKESSSSKQHSSKKSKKSNSK-----KNRSPSPQPQ                                                                         | 80                        |                         |
| TcPPEF  | GGGSANDQVHWPTCHFCKRIPEKEYNAHTVMCDEREVTCWNSWCRQIVKQGMLHNLHLEE                                                     | 98                        |                         |
| TbPPEF  | -----NQRHLPQCHFCKRFIAEKEYNAHTVMCDEREMTCWNSWCRQMVKQGMLSKHLEE                                                      | 95                        |                         |
| LmPPEF  | NGGAMADQSRWPTCHFCHRKVPDKDYNAHTVMCDEREVTCWNSWCRQIVRQGDQLQKHLEE                                                    | 113                       |                         |
|         |                                                                                                                  |                           |                         |
|         | IQXXXXXXXR                                                                                                       |                           |                         |
| HsPPEF2 | -AFKAAALIQRWYRRYVARLEMRRRC                                                                                       | CTWS-----                 | IFQSI EYAGQQDQVKLH 63   |
| MmPPEF  | -AFKAAALIQRWYRRYMARLEMRRRC                                                                                       | CTWN-----                 | IFQSI EYAGQQDQVKLH 63   |
| DmRdgC  | -AIRAAIFIQKWYRRHQARREMQRR                                                                                        | CNWQ-----                 | IFQNL EYASEQDQAELY 49   |
| CePPEF  | LTIKSAAILIQKWYRRCEARLEARRR                                                                                       | ATWQ-----                 | IFTALEYAGEQDQLKLY 126   |
| TcPPEF  | CAKKQRALCYKCGADLLATELQAHRDGC                                                                                     | QPQKCTSCGELCITRILMKWCPDNF | ITRVPIMH 158            |
| TbPPEF  | CAKNQRALCYKCGTEVLASDLQVHRDTC                                                                                     | PKKCSACGELCITRILSWCPHNF   | G-RIGATQ 154            |
| LmPPEF  | CRRRQKAIQKCGAEILAIEMLAHRDSC                                                                                      | PKPCPCQCGELCITRIHKWCPKTI  | LAKVKFIN 173            |
|         | .                                                                                                                |                           |                         |
|         | :                                                                                                                | *                         | *                       |
|         | :                                                                                                                | :                         | :                       |
|         |                                                                                                                  |                           |                         |
| HsPPEF2 | DFFSYLMDHFIP-----SSHND-----                                                                                      |                           | 80                      |
| MmPPEF  | EFFSYLVDHFTP-----SSHHE-----                                                                                      |                           | 80                      |
| DmRdgC  | KFFNDLIKHMPPQAAGRKNQYQGS                                                                                         | AH---VSVLDD-----          | 80                      |
| CePPEF  | DFFADVIRAMAENGKGGVENGRNSPL                                                                                       | MSALSHYA-----             | 161                     |
| TcPPEF  | GPFATEVLLARYVKGGAQNKSGGA                                                                                         | APVALVS-----YNVARMQLLWR   | WTAKASYLEEAI F 213      |
| TbPPEF  | GPFATEALS KKYLSGGGRPK--GAS                                                                                       | SVHNNSPPHVNFVARMQLLWR     | WIKTKSIEETL F 212       |
| LmPPEF  | GPFATEALQRRFMPPG---KEKD                                                                                          | PRAKLEYS-----VARMQLLWR    | WIKCKGMIEETI F 223      |
|         | *                                                                                                                |                           |                         |
|         |                                                                                                                  |                           |                         |
| HsPPEF2 | -----RDFLTRIFTEDRFAQDSEM                                                                                         | KKCSDYES-----IEVPDSYT     | GP SLSFPL 123           |
| MmPPEF  | -----RDFLNRMFTEERFAQDVE                                                                                          | TEEGDFES-----IEVPDSYT     | GP RLSFPL 123           |
| DmRdgC  | -----KDDLVEEFGDIVNAK-----                                                                                        |                           | IELPIRKN----- 103       |
| CePPEF  | -----KPSLMDSEGETVKKMLED                                                                                          | TSPTN-----VDIDRNYK        | GP T LSLPL 200          |
| TcPPEF  | RLTSKEMNLKKEGFAIFKALDKV                                                                                          | SDSHVLEPRRSRSILQTPV       | VAPAISSHYFPTRMAEPI 273  |
| TbPPEF  | RVMSREMDLKKEGFAIFKALDKV                                                                                          | NE SHVLAPKRSRSILQSPV      | VAPAVSSHYFPTRSSDPI 272  |
| LmPPEF  | RSVYKEMDLKKEGFAIFKAHDK                                                                                           | VNEQHVMAPKRSRSVIQAPV      | VAPATSSHYFPVNTNIP I 283 |
|         | .                                                                                                                |                           |                         |
|         | *                                                                                                                |                           |                         |
|         |                                                                                                                  |                           |                         |
| HsPPEF2 | LPDHATALVEA <b>FR</b> LK-- <b>QLHARYV</b> LNLLY <b>ET</b> KKHLVQLPNINRVSTCY <b>SEEIT</b>                         | -----                     | 175                     |
| MmPPEF  | LPDHATALVEA <b>FR</b> LK-- <b>QLHARYV</b> LNLLY <b>ET</b> TRKHLAQLPNINRVSTCY <b>SEEVT</b>                        | -----                     | 175                     |
| DmRdgC  | ---HIDLLIDV <b>FR</b> KKRGNRLHPKYVALILREAAKSLKQLPNISPVSTAVSQ <b>QVT</b>                                          | -----                     | 154                     |
| CePPEF  | DKPQVAKMIEA <b>FK</b> VN-- <b>KVLHPK</b> VYLMILHEARKIFKAMPVSVRISTSI <b>SNQVT</b>                                 | -----                     | 252                     |
| TcPPEF  | TIEVVQRLIND <b>L</b> TDH-- <b>VLLPYPA</b> AWRVFTDAMSHLNTMPNVVRLSP <b>PV</b> GARVSN <b>GR</b> INQ                 |                           | 331                     |
| TbPPEF  | TLDVVSRLMKD <b>L</b> SEH-- <b>ILPPYPA</b> VWRVFTDAMCYLNTMPNVVLLSP <b>P</b> LGARV <b>VN</b> GRV <b>NQ</b>         |                           | 330                     |
| LmPPEF  | TLHHVEQMIKD <b>I</b> KNR-- <b>VLLPYPA</b> AWRVFTDAMNHLNTMPNVV <b>R</b> SP <b>AV</b> GARVSN <b>GR</b> VI <b>Q</b> |                           | 341                     |
|         | ::. : . . . . . : : : : : * . : * . . . :                                                                        |                           |                         |

HsPPEF2 -----VCGDLHGQLDDLLIFIFYKNGLPSPERSYVFNDFVDRGKDSVEILMILFAFMLVY 230  
 MmPPEF -----VCGDLHGQLDDLLIFIFYKNGLPSPERAYVFNDFVDRGKDSVEILMVLFAFMLVY 230  
 DmRdgC -----VCGDLHGKLLDDLLVVLHKNGLPSSSNPYVFNDFVDRGKRGLEVLLLLLSLYLAF 209  
 CePPEF -----ICGDLHGKFDLLCIIILYKNGYPSVDNPIYFNDFVDRGGQSIEVLCVLFALVID 307  
 TcPPEF GSKVVVVDLHGQLADLLHILKEC GMPNEGTYIFNDFVDRGANGVEVLLILFSLMLAC 391  
 TbPPEF GSKVVVVDLHGQLADLLHILKEC GMPNDSTYIFNDFVDRGPNGVEVLLIIFSLMLAC 390  
 LmPPEF GCKVVVVDLHGQIADLLHILKES GMPSESNIYVFNDFVDRGACGVEIILILFSLMLAC 401  
 : \* \* \* \* \* : \* \* : : \* \* . \* : \* \* \* \* \* : \* \* : : : : : : : :

HsPPEF2 PKEFHLNRGNHEDHVNLRYGFTKEVMNKYKVGHEILRTLQDVFCWLPLATLIDEKVLV 290  
 MmPPEF PKEFHLNRGNHEDHVNLRYGFTKEVMHKYKIHGKKILRTLQDVFCWLPLATLIDEKVLV 290  
 DmRdgC PNAVFLNRGNHEDSVMNARYGFIREVESKYPRNHKRIILAFIDEVYRWLPGLSVLNSRVLI 269  
 CePPEF PMSIYLNLRGNHEDHIMNLRYGFIKELSTKYKDLSTPIRLEEDVFSWLP IATI IDRDIFV 367  
 TcPPEF PKYVTLNRGNHECDYMNEYGFDEVSTKYDRN---VFRLVQRFCALPLATIIGKKVFV 448  
 TbPPEF PKFVTLNRGNHECDYMNEYGFDEVSTKYDRN---VFRLVQRFCALPLATIIGRKVFV 447  
 LmPPEF PKYVTLNRGNHECDYMNEYGFDEVSTKYDRN---VFRLVQRFCALPLATLIGGKIFV 458  
 \* . \* \* \* \* \* : \* . \* \* \* \* : \* \* : : : : \* : . : : : : : : :

HsPPEF2 LHGGVSDITDELELDKIERSKIIVSTMCKTRQKSEKQMEKRRANQKSSAQGPWPFLPE 350  
 MmPPEF LHGGVSDKTDLELLAKLDRHKIIVSTMCKTRKESENREEQKRKDNQTSQGKPTPWFLPQ 350  
 DmRdgC VHGGFSDSTSELDLIKSIDRGKYVSI LRP----- 297  
 CePPEF VHGGISDQTEVSKLDKIPRHRFQSVLRP VNKGMES----- 404  
 TcPPEF VHGGLVNIEDLSRIQRFRQIP----- 474  
 TbPPEF VHGGVPRRKGVRIEDLSRIQRFRQIP----- 473  
 LmPPEF VHGGPPRRRGVINDLSRIQRFRQIP----- 484  
 : \* \* \* \* \* : \* :

HsPPEF2 SRSLPSSPLRLGS-YKAQKTSRSSIPCSGSLDGRELSR--QVRSSVELELERCRQOAGL 407  
 MmPPEF SRSLPSSPFHLGSGFKAYKAGRSCSIPC-GSPNSKELSRRGQVRRSDLELEQCRQOAGF 409  
 DmRdgC -----PLTD----- 301  
 CePPEF ----- 407  
 TcPPEF ----- 407  
 TbPPEF ----- 407  
 LmPPEF ----- 407

HsPPEF2 LVTGEKEEPSRSASEADSEA--GELRKPTQEWRQVVDILWSDPMAQEGCKANTIRGGGC 465  
 MmPPEF LGIREKGESLPLADADCVADGGVLEPTPEEWKQVVDILWSDPAAQEGCKANAVRGGGC 469  
 DmRdgC -----GEPLDKT--EWQQIFDIMWSDPQATMGCVPNTLRGAGV 337  
 CePPEF -----KENSAVNVDEWKQMLDIMWSDPKQNKGCWPNVFRGGGS 442  
 TcPPEF -----MPDYSQPEEDEFQDLLWSDPVEDLQGWRESPRGAGV 511  
 TbPPEF -----MPDYSQPEEDEFQDLLWSDPVEDLQGWRESHRGAGV 510  
 LmPPEF -----IPNYSQPEEDEFQDMLWSDPVEDIKSWRESQRGAGV 521  
 \* . . \* : : \* \* \* \* \* : \* \* \*

HsPPEF2 YFGPDVTQQLLQKYNLQFLIRSHECKPEGYEFCHNRKVLTFISASNYEYVGSNRGAYVKL 525  
 MmPPEF YFGPDVTERLMEKYKQLLIRSHECKPEGYEFCHNRKVLTFISASNYEYVGSNRGAYVKL 529  
 DmRdgC WFGPDVTDNFLQRHRLSYVIRSHECKPNGHEFMHDNKIITIFISASNYEYVGSNRGAYVIRL 397  
 CePPEF YFGADITASFLKHFRLLRVRSHECKPEGYEFHSHNNTCLTVFSASNYEYVGSNRGAYVKF 502  
 TcPPEF VFGADVTFEFLQNGLELVIRSHEECLRGYEEHHDGKLLTVFSASNYDGPETNFGSFAVF 571  
 TbPPEF EFGPDLTHEFLQSNGLLELIRSHCDCEGYEEFHGKLVTVFSASNYNGPDTNYGSAVF 570  
 LmPPEF EFGSDVTMEFLENNKLELIVRSHEDCLSGYEEHNNHKLTVFSASNYDGPNSNYGAICTF 581  
 \* \* . \* \* : : : : \* \* \* \* \* \* \* : \* \* : :

HsPPEF2 G-PALTPHIVQYQ-ANKVTHT-----LTMRQRISRVEES-- 557  
 MmPPEF G-PALTPHIVQYQ-ANKATHR-----LTMRQRISRVEES-- 561  
 DmRdgC N-NQLMPHFVQYIISAASQTKR-----LSFKQRMGIVESS-- 430  
 CePPEF IGKSKQPHFVQYM--ASKTHR-----STLRERLGVVEES-- 535  
 TcPPEF VGDNPEPSFHTYQVAEDDVEVQTLVDLGETFTPTLGRVS--SFATL-SQSKLLLR----- 623  
 TbPPEF IGDNPEPSFVSHKVLLEDDLEAHHHVDLGETQTGGGLG-----MTLTSLSMLHLV----- 618  
 LmPPEF IGDNPEPSYHTYQMFEDDYDSSQVSLTDSFTLTAPNIARISSFTATVGSVGFVGSKSNF 641  
 \* :

HsPPEF2 -----ALRALREKLFHSSDLLSEFKKHADAKVGLITLSDWAAAVESVLHLG 604  
 MmPPEF -----ALRALRQKLFHSSDLLVEFRKRDPESGVITLSDWATAVESVLHLG 608  
 DmRdgC -----ALKELAVRMRDRHDELEDEFKRYDKPDSGYISISHWCKVMENVTKLG 477  
 CePPEF -----AVKELKEKLSFHTDLQKEFEIMDIEKSGKLPILKMSDCVERITGLN 582  
 TcPPEF --RRAR-----DDVLRVLRERIRYQRHRLLAYFAKLDRTEKGSVWKIEWEAMRNVNLND 676  
 TbPPEF --RPAIRRRTKDEVLRVLRERVYQRHRLMAYFNKLDRTTEKGSVWKIEWEAMRNVNLND 676  
 LmPPEF MSRVLHRRRTKDNILRELREIRYQRHRLLAYFSKLDRTTEKGSVWKIEWESMRNVNLND 701  
 : : \* : : \* \* \* \* \* : \* : : :

HsPPEF2 LPWRMLRPQLVNSSADNM-----LEYSWLKLNLAKEQLSRENIQSSLL 647  
 MmPPEF LPWRMLRPQLVNSSADNV-----LEYRSWLDLAK-EQLSRENIQSSLL 651  
 DmRdgC LPWRLLRDKLAPGTDSDQK-----VNYNRTLDDLDTDVILEAEADGMSVM 521  
 CePPEF LPWIALAPKVATLSEDKY-----VMYKEDRRIAQVGGTHAQEKD--IV 624  
 TcPPEF LPWFFLRGYLVADDENTRVVYSHFLVKFHNFFQPLWLNWDWISACYHLTQQQRANHRISQY 736  
 TbPPEF LPWFFLRGYLAEDDDGRIWYSLFLVKFHNKQLSLWLNWISSARDRLIQQRANHRISQY 736  
 LmPPEF LPWYFLRGYLVVEVDDHSRIWYAPFLNRFHNVLQDLWGEERQSVCARVLQQQRMNHRISQL 761  
 \*\*\* \* :. : .

HsPPEF2 ETLYRNR-----SNLETIFRIIDSDHSGFISLDEFRQTWKLFS 686  
 MmPPEF EKLYRNR-----SNLETIFRIIDSDHSGFISLDEFRQTWKLFS 690  
 DmRdgC DALYANK-----ASLVAFNIIADNSGEITLDEFETAIDLVA 560  
 CePPEF ESLYRHK-----STLETLFRFMKDNISGQVSMKEEIDACEVLGK 663  
 TcPPEF VAKAFNKEQVSYNEFCSVIRAIIDYTMSEAQLFQLFVYLDEGGTGHIDGKFFVNMLSEMAA 796  
 TbPPEF VANSFNREQVGYNEFCVMRAIDYTMSDGHLFQLFVHFDERGVGFIDGRKFFVHMLSEANT 796  
 LmPPEF VSAAFNKEVVNYNEFCVMRAIDYTTSDCQLFQLFESFDEKGNNGHISGPEFLKKVQQIAN 821  
 : : \* : \* : \* \* : : \*

HsPPEF2 -----HMNIDITDDCICDLARSIDFNKDGHDIDINEFLEAFRLVEKSCPE---- 730  
 MmPPEF -----HMSIDITDDGICDLARSIDFNKDGHDIDINEFLEAFRLVEQSCLE---- 734  
 DmRdgC -----HMPGAYSKAEMLEKCRMMDLNGDGKVDLNEFLEAFRLSDLHRKEQQDE 608  
 CePPEF -----YTKRPLQTDYISQIAESIDFNKDGFDLNELEAFRLVDRPLLR---- 707  
 TcPPEF -YPLSDDLRLWDLGAMEQLQSVVIQGRSQLPYLFVVTSKDRALPKEKFMGLAQLGRGMRK 855  
 TbPPEF SHPGADPLRWDLAMEQLQSVVIQGRGQLQYLFVVTSKDCVLTKEFSFMWGLEQLGRGMRR 856  
 LmPPEF --GKPDPLRWDLAMEQLQNIQVVIQGRSQLPYLFVVTSKDKALSRERFMAGMAQLGRCMRK 879  
 : . : \* \*

HsPPEF2 -----GDASECPQATN-----AKDSGCSSPGAH----- 753  
 MmPPEF -----GHASACLQSTD-----TAESGHSSPGPC----- 757  
 DmRdgC NIRRRSTGRPSVAKTATDPVTLADKISKNTLVVEHDIDPTDCEKVIDPKKS----- 661  
 CePPEF -----  
 TcPPEF QLTQQQKEKIYEFLEAERAPPSG-VMFEHFLFMTAVFD---VQAMPRS-PAVVLDVNLVFG 910  
 TbPPEF QLTQQQKERIYEYLLERAPNGS-VLFGQFLFMTTVFD---NCTMSTS-SAIDLADINLVA 911  
 LmPPEF QLTQPQREAIQDFMKQRPVEGEEVTFDMFLLCVYVDFRRRTVAGMKSSYSLSDLNELGLAP 939

HsPPEF2 -----  
 MmPPEF -----  
 DmRdgC -----  
 CePPEF -----  
 TcPPEF NYLKNSSFSSMCK-- 923  
 TbPPEF YCLRNCSSFSSVFRD- 925  
 LmPPEF ISFRNTSFSGLGTSR 954

**Figure S2. Alignment of mammalian protein phosphatase-1 (PP1) and LmPPEF catalytic domains derived from homology modeling.**

The model was generated using the automated comparative protein modelling server Swiss-Model and the structure visualised using DeepView (Swiss Pdb viewer; Guex N, Peitsch MC. SWISS-MODEL and the Swiss-PdbViewer: an environment for comparative protein modeling. Electrophoresis 1997;18:2714-2723).  $\alpha$ -helices and  $\beta$ -sheets identified in the crystal structure of PP1 (Goldberg J, Huang HB, Kwon YG et al. Three-dimensional structure of the catalytic subunit of protein serine/threonine phosphatase-1. Nature 1995;376:745-753) are mapped onto the LmPPEF sequence. Residues highlighted in red are conserved residues that contribute to coordination of metal ions. Residues in blue contribute to the hydrogen bonding of the phosphorus oxygens. Residues in grey are not included in the model structure due to insufficient sequence identity.

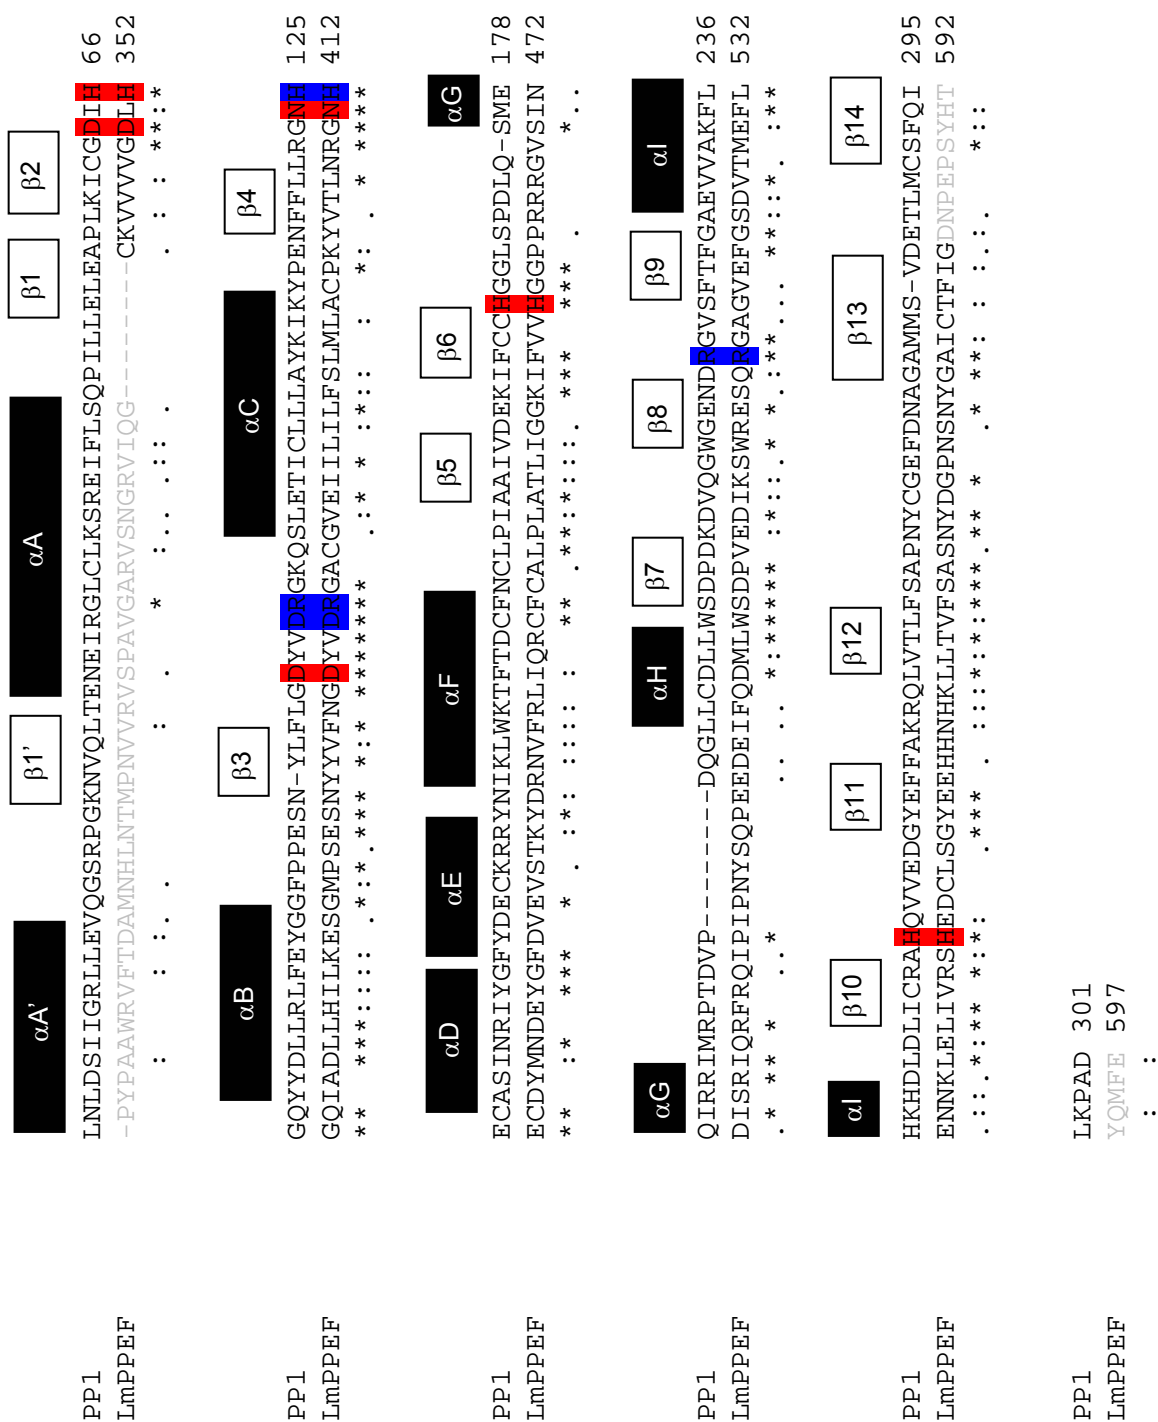

**Table S1. *Leishmania* N-myristoylated proteins - high confidence predictions**

| N-myristoylated <i>L. major</i> proteins | N terminus             | Description                                          | Score      | <i>T. brucei</i> orthologues                                                                                                     | <i>T. cruzi</i> orthologues                                                                                                                                           |
|------------------------------------------|------------------------|------------------------------------------------------|------------|----------------------------------------------------------------------------------------------------------------------------------|-----------------------------------------------------------------------------------------------------------------------------------------------------------------------|
| <a href="#">LmjF28.1770</a>              | MGTHVSKVKS VNMDAWAEST  | Arf GTPase activating protein, putative              | 0.99038119 | <a href="#">Tb11.01.0920</a>                                                                                                     | <a href="#">Tc00.1047053503677.4</a><br><a href="#">Tc00.1047053506223.10</a>                                                                                         |
| <a href="#">LmjF04.0480</a>              | MGNVFSSWFE GLFSNKNASI  | ADP-ribosylation factor, LmARF2 [1]                  | 0.99034681 | <a href="#">Tb09.160.5600</a>                                                                                                    | <a href="#">Tc00.1047053434945.4</a> ,<br><a href="#">Tc00.1047053509297.30</a> ,<br><a href="#">Tc00.1047053508197.20</a> ,<br><a href="#">Tc00.1047053508199.10</a> |
| <a href="#">LmjF20.1230</a>              | MGSRSKEAA PVTFKNGKPT   | hypothetical protein, conserved                      | 0.99034442 | <a href="#">Tb927.1.2160</a>                                                                                                     | <a href="#">Tc00.1047053508999.260</a> ,<br><a href="#">Tc00.1047053506563.170</a>                                                                                    |
| <a href="#">LmjF04.0890</a>              | MGNAASSPRR APSASSSSSP  | hypothetical protein, conserved                      | 0.99029122 | <a href="#">Tb09.211.0290</a>                                                                                                    | <a href="#">Tc00.1047053504255.30</a> ,<br><a href="#">Tc00.1047053510577.10</a> ,<br><a href="#">Tc00.1047053510575.239</a>                                          |
| <a href="#">LmjF27.1840</a>              | MGNRVSTAAA PFSLEDLEAL  | hypothetical protein, conserved                      | 0.99019717 | <a href="#">Tb927.2.4280</a>                                                                                                     | <a href="#">Tc00.1047053509099.20</a> ,<br><a href="#">Tc00.1047053509321.10</a>                                                                                      |
| <a href="#">LmjF16.1270</a>              | MGCRASASRN RESSHGSRAA  | hypothetical protein, conserved                      | 0.98972406 | <a href="#">Tb927.8.5160</a>                                                                                                     | <a href="#">Tc00.1047053506575.50h</a> ,<br><a href="#">Tc00.1047053511217.50 h</a>                                                                                   |
| <a href="#">LmjF23.0170</a>              | MGGKASKAET RLTSEAADAL  | hypothetical protein, conserved                      | 0.98967251 | -                                                                                                                                | <a href="#">Tc00.1047053505647.10</a>                                                                                                                                 |
| <a href="#">LmjF20.1270</a>              | MGCGSSAPKA DTSATNEEVR  | hypothetical protein, conserved                      | 0.98946806 | -                                                                                                                                | <a href="#">Tc00.1047053509001.30</a> ,<br><a href="#">Tc00.1047053506563.120</a>                                                                                     |
| <a href="#">LmjF03.0740</a>              | MGNSASSVGG AVPPQQDQQR  | cytochrome c oxidase copper chaperone, putative      | 0.98937282 | <a href="#">Tb927.3.2650</a>                                                                                                     | <a href="#">Tc00.1047053506691.64</a> ,<br><a href="#">Tc00.1047053508153.994</a>                                                                                     |
| <a href="#">LmjF31.0440</a>              | MGCCNSKETK KPKEEVLQRE  | cytoskeleton-associated protein CAP5.5, calpain-like | 0.98936046 | <a href="#">Tb04.1D20.740</a>                                                                                                    | <a href="#">Tc00.1047053509237.130</a> ,<br><a href="#">Tc00.1047053508555.60</a> ,<br><a href="#">Tc00.1047053511333.4</a>                                           |
| <a href="#">LmjF26.1440</a>              | MGSACSHGED ARHHRENKRN  | hypothetical protein, conserved                      | 0.98915106 | <a href="#">Tb927.7.510</a>                                                                                                      | <a href="#">Tc00.1047053503723.10</a> ,<br><a href="#">Tc00.1047053506287.20</a>                                                                                      |
| <a href="#">LmjF25.2060</a>              | MGARHSVPLR PNGQPSAQUAL | hypothetical protein, conserved                      | 0.989058   | <a href="#">Tb927.3.2150</a>                                                                                                     | <a href="#">Tc00.1047053507081.50</a>                                                                                                                                 |
| <a href="#">LmjF32.1810</a>              | MGGGLSKSQL NVHYQGATEA  | protein kinase, putative                             | 0.98904117 | -                                                                                                                                | -                                                                                                                                                                     |
| <a href="#">LmjF31.2790</a>              | MGGWLSSLLG KKEVRILMVG  | ADP-ribosylation factor, LmARF1 [1]                  | 0.98864783 | <a href="#">Tb09.211.4460</a><br><a href="#">Tb09.211.4470</a><br><a href="#">Tb09.211.4480</a><br><a href="#">Tb09.211.4490</a> | <a href="#">Tc00.1047053508415.40</a><br><a href="#">Tc00.1047053508415.50</a><br><a href="#">Tc00.1047053510755.50</a><br><a href="#">Tc00.1047053510755.60</a>      |
| <a href="#">LmjF33.1035</a>              | MGCSASKSKE VKPSGGPGAS  | hypothetical protein, conserved                      | 0.98757771 | <a href="#">Tb10.26.0245</a>                                                                                                     | <a href="#">Tc00.1047053509647.130</a>                                                                                                                                |
| <a href="#">LmjF09.1550</a>              | MGSSSSKAKA TPAVSVPRYE  | hypothetical protein, conserved                      | 0.98742829 | <a href="#">Tb11.01.5280</a>                                                                                                     | <a href="#">Tc00.1047053506753.40</a> ,<br><a href="#">Tc00.1047053510355.200</a>                                                                                     |
| <a href="#">LmjF18.1440</a>              | MGGRISREQM NDYREVAKER  | hypothetical protein, conserved                      | 0.98726004 | <a href="#">Tb10.389.1030</a>                                                                                                    | <a href="#">Tc00.1047053503455.20</a> ,<br><a href="#">Tc00.1047053511261.90</a>                                                                                      |
| <a href="#">LmjF04.0790</a>              | MGSNVSVLLH ADTPVPNSVI  | hypothetical protein, conserved                      | 0.98650482 | <a href="#">Tb09.211.0160</a>                                                                                                    | <a href="#">Tc00.1047053510579.50</a> ,<br><a href="#">Tc00.1047053510241.90</a>                                                                                      |
| <a href="#">LmjF16.0930</a>              | MGFRESKPKL SQTAEKPEKS  | hypothetical protein, conserved                      | 0.98640037 | <a href="#">Tb927.8.5430</a>                                                                                                     | <a href="#">Tc00.1047053509393.10</a> ,<br><a href="#">Tc00.1047053507491.140</a>                                                                                     |
| <a href="#">LmjF24.1730</a>              | MGCSASTHAS PEADKDAPLK  | protein kinase, putative                             | 0.98564192 | <a href="#">Tb08.30K1.240</a>                                                                                                    | <a href="#">Tc00.1047053506801.120</a> ,<br><a href="#">Tc00.1047053511907.240</a>                                                                                    |
| <a href="#">LmjF36.0530</a>              | MGDMLAKPET QKFSTVFETS  | protein phosphatase 2C-like protein                  | 0.98457176 | <a href="#">Tb10.70.2270</a>                                                                                                     | <a href="#">Tc00.1047053508659.40</a> ,<br><a href="#">Tc00.1047053510291.30</a>                                                                                      |
| <a href="#">LmjF05.0840</a>              | MGNDLSAMSG GGRNLEVVSE  | hypothetical protein, unknown function               | 0.98322847 | -                                                                                                                                | -                                                                                                                                                                     |
| <a href="#">LmjF06.0680</a>              | MGANSGKTAS SSSAVPAATT  | hypothetical protein, conserved                      | 0.98245443 | <a href="#">Tb07.27E10.540</a>                                                                                                   | <a href="#">Tc00.1047053508175.39</a> ,<br><a href="#">Tc00.1047053506825.140</a>                                                                                     |
| <a href="#">LmjF17.0370</a>              | MGQAASYAES SVQRALLRLK  | hypothetical protein, unknown function               | 0.98211815 | -                                                                                                                                | -                                                                                                                                                                     |
| <a href="#">LmjF18.1150</a>              | MGGKNSTQRQ GAQLRNGNGG  | hypothetical protein, conserved                      | 0.98151093 | <a href="#">Tb10.389.0570</a>                                                                                                    | <a href="#">Tc00.1047053503939.120</a> ,<br><a href="#">Tc00.1047053509805.80</a>                                                                                     |
| <a href="#">LmjF23.0460</a>              | MGCKSSAEAK PSETRSPSAR  | trypanothione synthetase, putative                   | 0.98097255 | <a href="#">Tb927.8.2410</a>                                                                                                     | <a href="#">Tc00.1047053504427.10</a> ,<br><a href="#">Tc00.1047053509331.134</a>                                                                                     |
| <a href="#">LmjF30.0660</a>              | MGCLNSKSTA EKTGTSSPKR  | hypothetical protein, conserved                      | 0.9791003  | <a href="#">Tb927.6.2090</a>                                                                                                     | <a href="#">Tc00.1047053507019.80</a>                                                                                                                                 |
| <a href="#">LmjF20.1260</a>              | MGSGFSRASA GDTSAPLPPC  | hypothetical protein, unknown function               | 0.97836    | -                                                                                                                                | -                                                                                                                                                                     |
| <a href="#">LmjF10.1140</a>              | MGNRTSHEQP TATGVTDIEL  | hypothetical protein, conserved                      | 0.9765795  | <a href="#">Tb927.8.4570</a>                                                                                                     | <a href="#">Tc00.1047053511409.40</a> ,<br><a href="#">Tc00.1047053509571.40</a>                                                                                      |
| <a href="#">LmjF13.0680</a>              | MGRGYSASRS KSGRPTLRMK  | hypothetical protein, conserved                      | 0.9740294  | <a href="#">Tb11.02.1670</a>                                                                                                     | <a href="#">Tc00.1047053506239.20</a> ,<br><a href="#">Tc00.1047053506177.10</a>                                                                                      |
| <a href="#">LmjF32.2140</a>              | MGNSSSREWF DPYAVNTPLA  | hypothetical protein, conserved                      | 0.9735331  | <a href="#">Tb11.01.7005</a>                                                                                                     | <a href="#">Tc00.1047053506425.50</a>                                                                                                                                 |
| <a href="#">LmjF20.1280</a>              | MGNKQSHAVG EFRYSGPTDD  | calpain-like cysteine peptidase, putative            | 0.9732664  | -                                                                                                                                | <a href="#">Tc00.1047053506563.110</a> ,<br><a href="#">Tc00.1047053509001.40</a>                                                                                     |
| <a href="#">LmjF14.0300</a>              | MGSWDSAYED DAMDTRKLYC  | hypothetical protein, conserved                      | 0.9728694  | <a href="#">Tb07.26A24.1030</a>                                                                                                  | <a href="#">Tc00.1047053504213.130</a> ,<br><a href="#">Tc00.1047053506985.20</a>                                                                                     |

|                             |                        |                                                               |           |                                                              |                                                                                                                                                                  |
|-----------------------------|------------------------|---------------------------------------------------------------|-----------|--------------------------------------------------------------|------------------------------------------------------------------------------------------------------------------------------------------------------------------|
| <a href="#">LmjF21.0300</a> | MGCSASPWAR WAAKVQHRCK  | hypothetical protein, conserved                               | 0.9719463 | <a href="#">Tb10.70.5700</a>                                 | <a href="#">Tc00.1047053508949.20</a><br><a href="#">Tc00.1047053510119.40</a>                                                                                   |
| <a href="#">LmjF20.0700</a> | MGATPSREAK PTIRSLRYGN  | hypothetical protein, conserved                               | 0.9705504 | <a href="#">Tb927.1.1470</a>                                 | <a href="#">Tc00.1047053511425.49</a>                                                                                                                            |
| <a href="#">LmjF31.1400</a> | MGALPSHETH ERGLYSHRHG  | hypothetical protein, conserved                               | 0.9704316 | <a href="#">Tb08.6H23.50</a>                                 | <a href="#">Tc00.1047053508965.100</a><br><a href="#">Tc00.1047053509007.10</a>                                                                                  |
| <a href="#">LmjF25.1750</a> | MGCGYSTYSA QDDIVWKYGG  | hypothetical protein, unknown function                        | 0.9702202 | -                                                            | <a href="#">Tc00.1047053477935.9</a><br><a href="#">Tc00.1047053510091.119</a>                                                                                   |
| <a href="#">LmjF23.1070</a> | MGSSCTKDSA KEPQKSADKI  | hydrophilic surface protein (HASPB)                           | 0.9698957 | -                                                            | -                                                                                                                                                                |
| <a href="#">LmjF36.0030</a> | MGCTASKTKT PAANVASKGA  | hypothetical protein, conserved                               | 0.969785  | <a href="#">Tb10.70.2830</a>                                 | <a href="#">Tc00.1047053506341.20</a><br><a href="#">Tc00.1047053506507.20</a>                                                                                   |
| <a href="#">LmjF36.4440</a> | MGSSSRQTP LPAGSADTAA   | hypothetical protein, conserved                               | 0.9683171 | <a href="#">Tb10.6k15.0500</a>                               | <a href="#">Tc00.1047053504147.90</a>                                                                                                                            |
| <a href="#">LmjF31.1510</a> | MGAVPSRETV EHWLSQPPFY  | hypothetical protein, unknown function                        | 0.9681234 | <a href="#">Tb927.4.4580</a>                                 | -                                                                                                                                                                |
| <a href="#">LmjF03.0230</a> | MGGAVSFCLQ KLNKVSEVEY  | long chain fatty Acyl CoA synthetase, putative                | 0.9675061 | <a href="#">Tb10.70.4200</a>                                 | <a href="#">Tc00.1047053503575.50</a><br><a href="#">Tc00.1047053510943.33</a>                                                                                   |
| <a href="#">LmjF20.1490</a> | MGAANSTCS ETKYRFKDFI   | hypothetical protein, conserved                               | 0.9669213 | <a href="#">Tb927.1.3290</a>                                 | <a href="#">Tc00.1047053503663.4</a><br><a href="#">Tc00.1047053510635.60</a>                                                                                    |
| <a href="#">LmjF10.1230</a> | MGSNASHTEP QVPRECTMVA  | hypothetical protein                                          | 0.9662321 | -                                                            | -                                                                                                                                                                |
| <a href="#">LmjF33.2380</a> | MGQDQSRKA CQLGQAETGG   | Golgi reassembly stacking protein (GRASP homologue), putative | 0.96612   | <a href="#">Tb11.02.0260</a>                                 | <a href="#">Tc00.1047053504153.320</a><br><a href="#">Tc00.1047053506301.20</a>                                                                                  |
| <a href="#">LmjF30.0070</a> | MGGHGSMNPN AQITTRDAAG  | hypothetical protein, conserved                               | 0.9600807 | <a href="#">Tb927.6.1450</a>                                 | <a href="#">Tc00.1047053505807.54</a><br><a href="#">Tc00.1047053509033.70</a>                                                                                   |
| <a href="#">LmjF23.1490</a> | MGGATSKDRY DRAAATGILT  | hypothetical protein, unknown function                        | 0.958393  | -                                                            | -                                                                                                                                                                |
| <a href="#">LmjF31.2280</a> | MGQWLASAFS SLMGKKEVRI  | ADP-ribosylation factor, LmARF3 [1]                           | 0.9567458 | -                                                            | -                                                                                                                                                                |
| <a href="#">LmjF27.1230</a> | MGAAAAPVR EAPVRYVAKQ   | hypothetical protein, conserved                               | 0.95649   | <a href="#">Tb11.39.0010</a>                                 | <a href="#">Tc00.1047053509837.20</a>                                                                                                                            |
| <a href="#">LmjF31.0920</a> | MGNRQSSVPL EGEHPEVY    | sodium stibogluconate resistance protein, putative            | 0.9509094 | <a href="#">Tb07.27E10.660</a>                               | <a href="#">Tc00.1047053506681.40</a><br><a href="#">Tc00.1047053506825.40</a>                                                                                   |
| <a href="#">LmjF31.0960</a> | MGNRQSSVPL EGEHPEVY    | sodium stibogluconate resistance protein, putative            | 0.9509094 | <a href="#">Tb07.27E10.660</a>                               | <a href="#">Tc00.1047053506681.40</a><br><a href="#">Tc00.1047053506825.40</a>                                                                                   |
| <a href="#">LmjF31.0930</a> | MGNRQSSVPL EGEHPEVY    | sodium stibogluconate resistance protein, putative            | 0.9509094 | <a href="#">Tb07.27E10.660</a>                               | <a href="#">Tc00.1047053506681.40</a><br><a href="#">Tc00.1047053506825.40</a>                                                                                   |
| <a href="#">LmjF24.1360</a> | MGSSSTLET AKLVRTLLSE   | hypothetical protein, conserved                               | 0.9505801 | <a href="#">Tb927.8.6860</a>                                 | <a href="#">Tc00.1047053507991.80</a><br><a href="#">Tc00.1047053504035.120</a>                                                                                  |
| <a href="#">LmjF04.0340</a> | MGQLFTSLWS MFNGNKS YKL | ADP-ribosylation factor, LmARLX [1]                           | 0.9493244 | <a href="#">Tb09.160.5300</a>                                | <a href="#">Tc00.1047053506627.60</a>                                                                                                                            |
| <a href="#">LmjF21.0861</a> | MGNSSSRSGS SLSHTAVGGS  | hypothetical protein                                          | 0.9478317 | -                                                            | -                                                                                                                                                                |
| <a href="#">LmjF20.1310</a> | MGCGASSENS SVTYVNGRPT  | calpain-like cysteine peptidase, SMP-1 [2]                    | 0.9157358 | <a href="#">Tb927.1.2260</a><br><a href="#">Tb927.1.2230</a> | <a href="#">Tc00.1047053509003.30</a><br><a href="#">Tc00.1047053509003.40</a><br><a href="#">Tc00.1047053506563.70</a><br><a href="#">Tc00.1047053506563.79</a> |
| <a href="#">LmjF36.5660</a> | MGQRGRVSP VVASASDPPS   | hypothetical protein, conserved                               | 0.914911  | <a href="#">Tb10.6k15.1280</a>                               | <a href="#">Tc00.1047053503525.40</a><br><a href="#">Tc00.1047053507825.30</a>                                                                                   |
| <a href="#">LmjF12.0660</a> | MGCDSKEGV ASNTASASSR   | serine/threonine protein phosphatase-like protein             | 0.9116546 | <a href="#">Tb927.1.4050</a>                                 | <a href="#">Tc00.1047053506529.380</a><br><a href="#">Tc00.1047053510889.80</a>                                                                                  |
| <a href="#">LmjF20.0705</a> | MGAVPSRECT SLFSYFRGSY  | hypothetical protein, conserved                               | 0.8998901 | <a href="#">Tb927.1.1500</a>                                 | <a href="#">Tc00.1047053511427.19</a><br><a href="#">Tc00.1047053504209.10</a>                                                                                   |
| <a href="#">LmjF19.1280</a> | MGTCPISQS EVGIVETCGR   | hypothetical protein, conserved                               | 0.8959736 | -                                                            | <a href="#">Tc00.1047053507659.10</a><br><a href="#">Tc00.1047053507585.20</a>                                                                                   |
| <a href="#">LmjF03.0520</a> | MGDRDSTQR DSRADRYGGD   | RNA binding protein, putative                                 | 0.8885153 | <a href="#">Tb10.70.3950</a>                                 | <a href="#">Tc00.1047053510265.40</a><br><a href="#">Tc00.1047053510311.50</a>                                                                                   |
| <a href="#">LmjF36.4600</a> | MGVGASALT SLSFHLLRPF   | hypothetical protein, conserved                               | 0.8857702 | <a href="#">Tb10.6k15.0340</a>                               | <a href="#">Tc00.1047053503847.50</a><br><a href="#">Tc00.1047053504103.60</a>                                                                                   |

All protein entries identified by GeneDB accession numbers. *L. major* specific proteins are highlighted or in red text; identical highlighting colour represents related function. Not all *T. brucei/T. cruzi* orthologues are predicted as N-myristoylated with high confidence (see Tables S2 and S3). References: [1] Price HP, Panethymitaki C, Goulding D. Functional analysis of TbARL1, an N-myristoylated Golgi protein essential for viability in bloodstream trypanosomes. *J Cell Sci* 2005;118:831-841; [2] Tull D, Vince JE, Callaghan JM. SMP-1, a member of a new family of small myristoylated proteins in kinetoplastid parasites, is targeted to the flagellum membrane in Leishmania. *Mol Biol Cell* 2004;15:4775-4786.



Table S2. *T. brucei* N-myristoylated proteins - high confidence predictions

| Accession no.                  | N-terminus            | Description                                | Score      |
|--------------------------------|-----------------------|--------------------------------------------|------------|
| <a href="#">Tb10.70.2270</a>   | MGETLSKPVT EKHTSTFETS | protein phosphatase 2C-like, putative      | 0.99037937 |
| <a href="#">Tb11.02.0010</a>   | MGCGGSKPNA VSRDVEEKAL | hypothetical protein, conserved            | 0.9901967  |
| <a href="#">Tb09.160.5300</a>  | MGQLISGLWS VFNPNRHLYK | ADP-ribosylation factor, TbARLX [1]        | 0.98999036 |
| <a href="#">Tb09.211.0160</a>  | MGSDLSIVLR TCVAAPDCTK | hypothetical protein, conserved            | 0.9898953  |
| <a href="#">Tb10.70.5540</a>   | MGGSYSTVKT QRELRNADLK | ubiquitin hydrolase, putative              | 0.98970955 |
| <a href="#">Tb11.39.0010</a>   | MGAARSKPAR EAPVRYVAKQ | hypothetical protein, conserved            | 0.98970702 |
| <a href="#">Tb08.5H5.70</a>    | MGNNGSSTVR PPASQTKRQG | hypothetical protein, conserved            | 0.98962292 |
| <a href="#">Tb08.26E13.20</a>  | MGCGGSKTST VEFINGQPTV | flagellar calcium-binding protein          | 0.98957076 |
| <a href="#">Tb927.1.2230</a>   | MGCGGSKTST VEFINGQPTV | calpain-like protein fragment, putative    | 0.98933103 |
| <a href="#">Tb09.160.5600</a>  | MGNVLSWFEG LFSKKDATIL | ADP-ribosylation factor, TbARF2 [1]        | 0.9893292  |
| <a href="#">Tb09.160.1330</a>  | MGSSMSCLEV GSDSRCFGLP | hypothetical protein, conserved            | 0.98922819 |
| <a href="#">Tb08.30K1.240</a>  | MGCGASSRVV ESDDRERHKS | Ser/ Thr protein kinase, putative          | 0.98919997 |
| <a href="#">Tb08.5H5.30</a>    | MGCSASKDTT NSKDGAASKG | flagellar calcium-binding protein TB-44A   | 0.98895118 |
| <a href="#">Tb11.53.0001</a>   | MGTMSGNQG RKRQRISTPE  | hypothetical protein, leucine-rich repeats | 0.98895106 |
| <a href="#">Tb11.46.0013</a>   | MGSECSRHSN QTELRDERFC | hypothetical protein, conserved            | 0.98884212 |
| <a href="#">Tb927.1.1020</a>   | MGCAGSQQK PRSNQNIPTK  | hypothetical protein, conserved            | 0.98871979 |
| <a href="#">Tb927.1.2150</a>   | MGLFLSKQGE GQLLAEPTMQ | calpain-like protein fragment, putative    | 0.9886871  |
| <a href="#">Tb08.5H5.50</a>    | MGCSGSKNTT NSKDGAASKG | flagellar calcium-binding protein          | 0.98854366 |
| <a href="#">Tb11.02.1220</a>   | MGQAGGKEQK RQQEKWEPPV | proteasome regulatory ATPase subunit 2     | 0.98821444 |
| <a href="#">Tb04.3M17.490</a>  | MGSAAGKIGE KKHDRGEKLR | hypothetical protein                       | 0.98766599 |
| <a href="#">Tb10.26.0245</a>   | MGCGDSKVRQ GGPSRPPPPR | hypothetical protein, conserved            | 0.98653345 |
| <a href="#">Tb08.26A17.60</a>  | MGCGGSAPAN KDRHVGADPP | hypothetical protein                       | 0.98639942 |
| <a href="#">Tb08.26A17.40</a>  | MGCGGSAPAN KDRHVGADPP | hypothetical protein                       | 0.98639942 |
| <a href="#">Tb10.70.5250</a>   | MGGCVSTALK VGAETVAEGH | metacaspase MCA4                           | 0.98619341 |
| <a href="#">Tb08.26A17.50</a>  | MGCGGSAPAN KNRHVGADPP | hypothetical protein                       | 0.98570268 |
| <a href="#">Tb08.26N11.570</a> | MGCGGSAPAN KDKHVGADPP | hypothetical protein                       | 0.98558802 |
| <a href="#">Tb04.1D20.740</a>  | MGCGGSKVKP QPPQAAAPPP | cytoskeleton-associated protein CAP5.5 [2] | 0.98461163 |

|                                |                        |                                                        |            |
|--------------------------------|------------------------|--------------------------------------------------------|------------|
| <a href="#">Tb927.1.2120</a>   | MGCGASSTQS EDGMHEPIPP  | calpain, putative                                      | 0.98448321 |
| <a href="#">Tb10.389.0570</a>  | MGGSSSANRN NRPPNRVSGS  | hypothetical protein                                   | 0.98377993 |
| <a href="#">Tb07.27E10.540</a> | MGTTASTDSA DSPFSVRSVD  | hypothetical protein                                   | 0.98374526 |
| <a href="#">Tb04.3I12.600</a>  | MGALPSRETQ RRGlySHRHG  | hypothetical protein                                   | 0.98372966 |
| <a href="#">Tb10.26.0825</a>   | MGTIFSNVRT HEEVPPEVKD  | hypothetical protein, conserved                        | 0.98300802 |
| <a href="#">Tb04.26G5.164</a>  | MGQDQSMFAFA NDTISGEQYR | hypothetical protein, conserved                        | 0.98105446 |
| <a href="#">Tb10.70.4650</a>   | MGNCLCCRDK HKHEPEPEVV  | hypothetical protein, conserved                        | 0.9793612  |
| <a href="#">Tb07.15M23.530</a> | MGCGDSRVRA SAQPQHQSHP  | hypothetical protein                                   | 0.9772366  |
| <a href="#">Tb08.6H23.50</a>   | MGALPSRETQ HRGLYSHRHG  | hypothetical protein                                   | 0.9745772  |
| <a href="#">Tb11.02.3780</a>   | MGGCTSRGLS EEKLACYSHR  | phosphoinositide-specific<br>phospholipase C, putative | 0.9720402  |
| <a href="#">Tb09.160.0950</a>  | MGQRGSSPGI CNYTNTEKD   | hypothetical protein, conserved                        | 0.9690323  |
| <a href="#">Tb10.61.1480</a>   | MGGGACKMER HDVQPRVSSS  | hypothetical protein, conserved                        | 0.9645248  |
| <a href="#">Tb07.10C21.410</a> | MGCNLSSSTK NVNPFVKGKV  | hypothetical protein, conserved                        | 0.9636023  |
| <a href="#">Tb07.8P12.840</a>  | MGGGGSIPRK KATSARQVST  | hypothetical protein, conserved                        | 0.9635237  |
| <a href="#">Tb11.01.1020</a>   | MGCQQSGVRM SPQDLSDRTP  | hypothetical protein, conserved                        | 0.9606532  |
| <a href="#">Tb10.6k15.2160</a> | MGCSASF5FF PRCDTATNRI  | hypothetical protein                                   | 0.9596866  |
| <a href="#">Tb08.4A8.170</a>   | MGQKSSTAAN EGRPRSYLV   | hypothetical protein, conserved                        | 0.9596286  |
| <a href="#">Tb11.02.1670</a>   | MGRGYSNSRS RSLRPTLRMK  | hypothetical protein, conserved                        | 0.9571304  |
| <a href="#">Tb11.01.1420</a>   | MGNAPSFCCC CFPFFSQRRR  | hypothetical protein, conserved                        | 0.9524696  |
| <a href="#">Tb07.8P12.730</a>  | MGSGCSTESS TDVRC5FVGL  | hypothetical protein, conserved                        | 0.9447624  |
| <a href="#">Tb08.26A17.310</a> | MGQHSAKEFR GSRRGESNSG  | hypothetical protein, conserved                        | 0.9445662  |
| <a href="#">Tb03.3K10.420</a>  | MGCGIATLFP YSKGSSVSPT  | hypothetical protein, conserved                        | 0.9401887  |
| <a href="#">Tb10.70.6250</a>   | MGSGGSPLLL SHCW5CFPCA  | hypothetical protein                                   | 0.939623   |
| <a href="#">Tb07.2F2.550</a>   | MGALVSQIKS LLGILPADRK  | ADP-ribosylation factor,<br>TbARL1 [1]                 | 0.9383506  |
| <a href="#">Tb10.6k15.0500</a> | MGSSSSSAND SSSANMDAAS  | hypothetical protein, conserved                        | 0.9346623  |
| <a href="#">Tb927.1.1420</a>   | MGAFPSHDAP ELIYSMLVLR  | hypothetical protein, conserved                        | 0.9297298  |
| <a href="#">Tb10.6k15.1280</a> | MGSFTSCDQR PTASTTAAPH  | hypothetical protein, conserved                        | 0.9243812  |
| <a href="#">Tb10.6k15.3950</a> | MGSTSSACRR LETACRTGEN  | hypothetical protein, conserved                        | 0.917454   |
| <a href="#">Tb08.28F14.40</a>  | MGDSISPSEL LPGHAGEEHF  | RNA-binding protein RBP10,<br>putative                 | 0.9113934  |



|                               |                        |                                       |           |
|-------------------------------|------------------------|---------------------------------------|-----------|
| <a href="#">Tb06.4M18.340</a> | MGLCNSKSF E RDQLAPPPGN | hypothetical protein, conserved       | 0.9047419 |
| <a href="#">Tb10.389.1030</a> | MGYTF SRAQM EDYKELVKGR | hypothetical protein, conserved       | 0.8943619 |
| <a href="#">Tb04.3I12.520</a> | MGA VPSRESL SRGLCRLPDY | hypothetical protein                  | 0.8882656 |
| <a href="#">Tb09.160.4560</a> | MGF GSSKPKN KPSKADSKNS | arginine kinase                       | 0.874727  |
| <a href="#">Tb927.1.4050</a>  | MGCSTSKGDP LRTNKGAGDG  | Ser/Thr protein phosphatase<br>(PPEF) | 0.8666006 |
| <a href="#">Tb08.6H23.30</a>  | MGAAPSRETL RRGLYNVPTQ  | hypothetical protein                  | 0.8537426 |

*T. brucei* proteins also predicted as N-myristoylated with high confidence in *L. major* are in red text.

References: [1] Price HP, Panethymitaki C, Goulding D. Functional analysis of TbARL1, an N-myristoylated Golgi protein essential for viability in bloodstream trypanosomes. *J Cell Sci* 2005;118:831-841; [2] Hertz-Fowler C, Ersfeld K, Gull K. CAP5.5, a life-cycle-regulated, cytoskeleton-associated protein is a member of a novel family of calpain-related proteins in *Trypanosoma brucei*. *Mol Biochem Parasitol.* 2001;116:25-34.

Table S3. *T. cruzi* N-myristoylated proteins - high confidence predictions

| Accession no.                          | N-terminus            | Description                                          | Score      |
|----------------------------------------|-----------------------|------------------------------------------------------|------------|
| <a href="#">Tc00.1047053507011.80</a>  | MGTNGSKDER WQRDSEAPSC | hypothetical protein                                 | 0.99024417 |
| <a href="#">Tc00.1047053507005.40</a>  | MGNNGSKGER WQRDSEAPSC | hypothetical protein                                 | 0.99023844 |
| <a href="#">Tc00.1047053509237.130</a> | MGCCASKEKQ PRPGAAAAPT | cytoskeleton-associated protein CAP5.5, putative     | 0.99022871 |
| <a href="#">Tc00.1047053504933.30</a>  | MGSVFSKKSE EPPKAQTGKA | hypothetical protein                                 | 0.9902219  |
| <a href="#">Tc00.1047053506627.60</a>  | MGTLFSSFWS LFVPSRNYKL | ADP-ribosylation factor, TcARLX                      | 0.99019659 |
| <a href="#">Tc00.1047053510839.20</a>  | MGSILSKKSE EPPKAQTGKA | hypothetical protein                                 | 0.99017361 |
| <a href="#">Tc00.1047053507803.30</a>  | MGGGISNANQ RENAQDDDG  | hypothetical protein                                 | 0.99007086 |
| <a href="#">Tc00.1047053507063.290</a> | MGGGISNTNQ RENAQDDNVN | sericin MG-2 -greater wax moth (fragments), putative | 0.99000427 |
| <a href="#">Tc00.1047053503409.10</a>  | MGCSQSKTRT KEWGGPQRR  | hypothetical protein, conserved                      | 0.98992987 |
| <a href="#">Tc00.1047053509965.20</a>  | MGCGVSRQPF STELRPLRAT | hypothetical protein                                 | 0.98967212 |
| <a href="#">Tc00.1047053510901.190</a> | MGCRHSGPRM PPLEQQQGH  | hypothetical protein, conserved                      | 0.98954869 |
| <a href="#">Tc00.1047053506681.40</a>  | MNGASVGEN RHSQLFQQGY  | Sodium stibogluconate resistance protein, putative   | 0.98940584 |
| <a href="#">Tc00.1047053506825.40</a>  | MNGASVGEN RHSQLFQQGY  | Sodium stibogluconate resistance protein, putative   | 0.98940584 |
| <a href="#">Tc00.1047053508175.60</a>  | MGCSNSKNQK GREDKVDPHE | hypothetical protein                                 | 0.98933805 |
| <a href="#">Tc00.1047053506825.160</a> | MGCSNSKNQK EREDKVDPHE | hypothetical protein                                 | 0.98932215 |
| <a href="#">Tc00.1047053511333.4</a>   | MGCCASKEKQ PRPEAAAGPT | hypothetical protein                                 | 0.98916881 |
| <a href="#">Tc00.1047053508555.60</a>  | MGCCASKEKQ PRPEAAAGPT | cytoskeleton-associated protein CAP5.5, putative     | 0.98916881 |
| <a href="#">Tc00.1047053507891.47</a>  | MGACGSKDST SDKGLASDKD | hypothetical protein                                 | 0.98916826 |
| <a href="#">Tc00.1047053507891.20</a>  | MGCCGSKEDT CGLVYMEMRR | hypothetical protein                                 | 0.98915021 |
| <a href="#">Tc00.1047053506749.10</a>  | MGCCGSKEDT CGLVYMEMLR | hypothetical protein                                 | 0.98915021 |
| <a href="#">Tc00.1047053511421.150</a> | MGCKESSLRS PDVKKKDEL  | hypothetical protein, conserved                      | 0.98894311 |
| <a href="#">Tc00.1047053507623.50</a>  | MGAVHSQAQE KQGMEEKYNN | oxidoreductase, putative                             | 0.98893028 |
| <a href="#">Tc00.1047053510729.60</a>  | MGCVLSNQKL LQNSNRQCSS | hypothetical protein, conserved                      | 0.98891372 |
| <a href="#">Tc00.1047053506885.354</a> | MGCVLSNQKL LQNSNRQCNS | hypothetical protein                                 | 0.98891372 |
| <a href="#">Tc00.1047053508921.30</a>  | MGGGVSTRKQ MQDDRNVWNS | MCAK-like kinesin, putative                          | 0.98887981 |
| <a href="#">Tc00.1047053507023.90</a>  | MGGGLSRQEE LFVLGQWPEL | hypothetical protein, conserved                      | 0.98861717 |

|                                        |                       |                                          |            |
|----------------------------------------|-----------------------|------------------------------------------|------------|
| <a href="#">Tc00.1047053509785.40</a>  | MWRCCGRLHV ALLRARWASA | RHS1 protein, putative                   | 0.98844714 |
| <a href="#">Tc00.1047053511261.90</a>  | MGQGFSRAQM EEYKELVKDR | hypothetical protein,<br>conserved       | 0.98817444 |
| <a href="#">Tc00.1047053503455.20</a>  | MGQGFSRAQM EEYKELVKDR | hypothetical protein,<br>conserved       | 0.98817444 |
| <a href="#">Tc00.1047053506287.100</a> | MSGGGSTSLG GRITTVKEKK | hypothetical protein,<br>conserved       | 0.98805283 |
| <a href="#">Tc00.1047053508881.150</a> | MSGGGSTSLG GRITTVKEKK | hypothetical protein,<br>conserved       | 0.98805283 |
| <a href="#">Tc00.1047053511907.240</a> | MGCGASSRVK VPPVCRRSSS | Ser/Thr protein kinase,<br>putative      | 0.98791753 |
| <a href="#">Tc00.1047053508999.230</a> | MGNQVSSTKG KSGNNIVTT  | calpain-like protease,<br>putative       | 0.98774301 |
| <a href="#">Tc00.1047053503939.120</a> | MGANSSRERR SQRRSQSNAV | hypothetical protein,<br>conserved       | 0.98752071 |
| <a href="#">Tc00.1047053511123.20</a>  | GRASATPNAA GTVRPNRDC  | RHS1 protein                             | 0.98740598 |
| <a href="#">Tc00.1047053508277.220</a> | MGSAFSGEMS DTRELASVFL | hypothetical protein                     | 0.98719425 |
| <a href="#">Tc00.1047053509945.30</a>  | MGSAFSGEMS DTRELASVFL | hypothetical protein                     | 0.98719425 |
| <a href="#">Tc00.1047053509647.130</a> | MGCKNSKARE PPADTVTAAQ | hypothetical protein                     | 0.98686375 |
| <a href="#">Tc00.1047053508869.50</a>  | MMMCRLCAL LVLALCCCPS  | hypothetical protein                     | 0.98673219 |
| <a href="#">Tc00.1047053511071.90</a>  | MGARHSCPVP SAKAPVPSVP | hypothetical protein                     | 0.98657112 |
| <a href="#">Tc00.1047053508999.250</a> | MGSSTSKHNP RELLATPAMR | hypothetical protein,<br>conserved       | 0.98651511 |
| <a href="#">Tc00.1047053506749.20</a>  | MGACGSKGST SDKGLASDKD | flagellar calcium-binding<br>protein [2] | 0.98597729 |
| <a href="#">Tc00.1047053508141.70</a>  | MGGGASTRKQ MQDDRNWNS  | MCAK-like kinesin,<br>putative           | 0.98595934 |
| <a href="#">Tc00.1047053506925.220</a> | MGTSMCVPRR RRDDSPLSYF | hypothetical protein,<br>conserved       | 0.98575612 |
| <a href="#">Tc00.1047053506563.180</a> | MGSSTSKHNP KELLATPAMR | hypothetical protein,<br>conserved       | 0.98542494 |
| <a href="#">Tc00.1047053508813.80</a>  | MGGRTSELQS QTPPSSLEQN | hypothetical protein,<br>conserved       | 0.98448939 |
| <a href="#">Tc00.1047053508917.20</a>  | MGCGASRNVK ADADVSLPVF | hypothetical protein,<br>conserved       | 0.98407297 |
| <a href="#">Tc00.1047053508355.370</a> | MGETCSKTAN AAALNRRIQ  | hypothetical protein,<br>conserved       | 0.98358552 |
| <a href="#">Tc00.1047053508357.30</a>  | MGETCSKTAN AAALNRRIQ  | hypothetical protein,<br>conserved       | 0.98358552 |
| <a href="#">Tc00.1047053508999.220</a> | MGCGASTTQR PTTVAPEWNA | calpain, putative                        | 0.98329955 |
| <a href="#">Tc00.1047053506513.150</a> | MGCGASRKVK ADADVSLPVF | hypothetical protein,<br>conserved       | 0.98302486 |
| <a href="#">Tc00.1047053509007.10</a>  | MGALPSRETQ RRGVYSHRHG | hypothetical protein                     | 0.98264043 |
| <a href="#">Tc00.1047053508965.100</a> | MGALPSRETQ RRGVYSHRHG | hypothetical protein                     | 0.98264043 |
| <a href="#">Tc00.1047053510575.239</a> | MGAAASSGRR VPRATSASPY | hypothetical protein                     | 0.98248632 |

|                                        |                        |                                                               |            |
|----------------------------------------|------------------------|---------------------------------------------------------------|------------|
| <a href="#">Tc00.1047053505943.20</a>  | MGAVNSQAE GQGMEEKDNN   | oxidoreductase, putative                                      | 0.98228996 |
| <a href="#">Tc00.1047053506563.110</a> | MGCGSSKSKT KADDFVNGRP  | calpain-like cysteine peptidase, putative                     | 0.98185002 |
| <a href="#">Tc00.1047053509837.20</a>  | MGAARSRPAR EAPVRYVAKQ  | hypothetical protein, conserved                               | 0.98157868 |
| <a href="#">Tc00.1047053506363.130</a> | MGDEGSGSKE ESSGVPDDR   | hypothetical protein, conserved                               | 0.98092273 |
| <a href="#">Tc00.1047053504153.320</a> | MGQEGSKVKE TLKGICGLQV  | Golgi reassembly stacking protein (GRASP homologue), putative | 0.98086905 |
| <a href="#">Tc00.1047053506301.20</a>  | MGQEGSKVKE TLKGICGLQV  | Golgi reassembly stacking protein (GRASP homologue), putative | 0.98086905 |
| <a href="#">Tc00.1047053503955.50</a>  | MGSVPSREFH ESPDALFFTR  | hypothetical protein                                          | 0.98036138 |
| <a href="#">Tc00.1047053507063.60</a>  | MGSVPSREFH ESPDALFFTR  | hypothetical protein                                          | 0.98036138 |
| <a href="#">Tc00.1047053507485.80</a>  | MGQSNSWALA SDTIKGEQYR  | hypothetical protein, conserved                               | 0.9800526  |
| <a href="#">Tc00.1047053507159.14</a>  | MGQSNSWALA SDTIKGEQYR  | hypothetical protein                                          | 0.9800526  |
| <a href="#">Tc00.1047053511389.50</a>  | MGAVPSRETQ RRGLYFPRAP  | hypothetical protein                                          | 0.9795058  |
| <a href="#">Tc00.1047053506825.150</a> | MGNCCSSNSK KRRQPAAHV   | hypothetical protein                                          | 0.9782967  |
| <a href="#">Tc00.1047053506563.200</a> | MGCGASTTQK PTTVAPEWNV  | calpain, putative                                             | 0.9779467  |
| <a href="#">Tc00.1047053509001.40</a>  | MGCGSSKSKT KADGFVNGRP  | calpain-like cysteine peptidase, putative                     | 0.9766528  |
| <a href="#">Tc00.1047053509805.80</a>  | MGVNSSRERR SQRRSQSNAV  | hypothetical protein, conserved                               | 0.9765709  |
| <a href="#">Tc00.1047053511903.10</a>  | MGAHHSFPVP SAKAPVPSPV  | hypothetical protein                                          | 0.9760431  |
| <a href="#">Tc00.1047053508175.50</a>  | MGNCCSSNSK KRRLPKEAHV  | hypothetical protein                                          | 0.9751612  |
| <a href="#">Tc00.1047053504147.90</a>  | MGGSSKPEL KVGEKGAIAS   | hypothetical protein, conserved                               | 0.9748331  |
| <a href="#">Tc00.1047053506563.190</a> | MGNNGSSTKG KSGNNIVTT   | calpain-like cysteine peptidase, putative                     | 0.9736424  |
| <a href="#">Tc00.1047053509393.10</a>  | MGIRPSKTQG QRKSSVETPK  | hypothetical protein, conserved                               | 0.9721153  |
| <a href="#">Tc00.1047053508999.260</a> | MGSSSSKLT Y ENGKPTFGEA | hypothetical protein, conserved                               | 0.9716336  |
| <a href="#">Tc00.1047053506563.170</a> | MGSSSSKLT Y ENGKPSFGEI | hypothetical protein, conserved                               | 0.9708798  |
| <a href="#">Tc00.1047053507669.239</a> | IDKLDKAASE ALSAMGPSMT  | hypothetical protein                                          | 0.9696272  |
| <a href="#">Tc00.1047053506563.79</a>  | MGCGASSKPS TVEYKNGKPS  | hypothetical protein,                                         | 0.96946    |
| <a href="#">Tc00.1047053509003.30</a>  | MGCGASSKPS TVEYKNGKPS  | calpain-like cysteine peptidase, putative                     | 0.96946    |
| <a href="#">Tc00.1047053509641.10</a>  | MGQLLSFNAT HEEVPEDVKE  | hypothetical protein                                          | 0.9693288  |
| <a href="#">Tc00.1047053511217.50</a>  | MGCRQSVAKR PVDPQEAAAA  | hypothetical protein, conserved                               | 0.9691444  |

|                                        |                       |                                                   |           |
|----------------------------------------|-----------------------|---------------------------------------------------|-----------|
| <a href="#">Tc00.1047053510151.19</a>  | MGGLISTLMD IRNSMSLVPH | hypothetical protein,                             | 0.9685729 |
| <a href="#">Tc00.1047053504069.53</a>  | MFSSKTEYDR GVNTFSPEGR | hypothetical protein                              | 0.9684737 |
| <a href="#">Tc00.1047053506829.110</a> | MGGLISTLMD LRNSMSLVPH | fatty acyl CoA synthetase 2                       | 0.9677306 |
| <a href="#">Tc00.1047053506575.50</a>  | MGCRQSVAKR PVAPQEAAAA | hypothetical protein,<br>conserved                | 0.9676109 |
| <a href="#">Tc00.1047053509233.239</a> | GSCVPLQRYV DETGDVQTPV | hypothetical protein                              | 0.9660238 |
| <a href="#">Tc00.1047053510579.50</a>  | MGSDLSVVVQ ACAPVPHVIH | hypothetical protein,<br>conserved                | 0.9625061 |
| <a href="#">Tc00.1047053510241.90</a>  | MGSDLSVVVQ ACAPVPHVIH | hypothetical protein,<br>conserved                | 0.9625061 |
| <a href="#">Tc00.1047053511425.49</a>  | MGGVPSRDAC PTFPSLRYGS | hypothetical protein                              | 0.9568907 |
| <a href="#">Tc00.1047053506513.60</a>  | MGAWISQLKA ALGFLPADKK | ADP-ribosylation factor,<br>TcARL1A [1]           | 0.9552285 |
| <a href="#">Tc00.1047053507491.140</a> | MGIRPSKTQG QRKSSVEAPK | hypothetical protein,<br>conserved                | 0.9548726 |
| <a href="#">Tc00.1047053506563.50</a>  | MGGASSTSC DDPTTTSRIK  | hypothetical protein,<br>conserved                | 0.9507879 |
| <a href="#">Tc00.1047053509003.60</a>  | MGGASSTSC DDPTTTSRIK  | hypothetical protein,<br>conserved                | 0.9507879 |
| <a href="#">Tc00.1047053506529.380</a> | MGCTNTKESS ERGGGDASEL | serine/threonine protein<br>phosphatase, putative | 0.948353  |
| <a href="#">Tc00.1047053506801.120</a> | MGCGASSRVK VPPGCRGLSS | Ser/Thr protein kinase,<br>putative               | 0.9430079 |
| <a href="#">Tc00.1047053510889.80</a>  | MGCTNTKESS ERGGGNASEL | serine/threonine protein<br>phosphatase, putative | 0.9423383 |
| <a href="#">Tc00.1047053508199.10</a>  | MGAVMSWFDG LFAKKDATIL | ADP-ribosylation factor,<br>TcARF2 [1]            | 0.9356146 |
| <a href="#">Tc00.1047053509297.30</a>  | MGAVMSWFDG LFAKKDATIL | ADP-ribosylation factor,<br>TcARF2 [1]            | 0.9356146 |
| <a href="#">Tc00.1047053508197.20</a>  | MGAVMSWFDG LFAKKDATIL | ADP-ribosylation factor,<br>TcARF2 [1]            | 0.9356146 |
| <a href="#">Tc00.1047053434945.4</a>   | MGAVMSWFDG LFAKKDATIL | hypothetical protein                              | 0.9356146 |
| <a href="#">Tc00.1047053510755.60</a>  | MGQWLASAFK SLLGKQEVRI | ADP-ribosylation factor,<br>TcARF1 [1]            | 0.9285932 |
| <a href="#">Tc00.1047053510755.50</a>  | MGQWLASAFK SLLGKQEVRI | ADP-ribosylation factor,<br>TcARF1 [1]            | 0.9285932 |
| <a href="#">Tc00.1047053508415.50</a>  | MGQWLASAFK SLLGKQEVRI | ADP-ribosylation factor,<br>TcARF1 [1]            | 0.9285932 |
| <a href="#">Tc00.1047053508415.40</a>  | MGQWLASAFK SLLGKQEVRI | ADP-ribosylation factor,<br>TcARF1 [1]            | 0.9285932 |
| <a href="#">Tc00.1047053510329.360</a> | MGFHHSKSL SSTCFDAVIR  | hypothetical protein,<br>conserved                | 0.9280773 |
| <a href="#">Tc00.1047053507257.150</a> | MGFHHSKSL SSTCFDAVIR  | hypothetical protein,<br>conserved                | 0.9280773 |
| <a href="#">Tc00.1047053511319.30</a>  | MGEIFSSVWA SEGNIARQCV | hypothetical protein                              | 0.9264863 |
| <a href="#">Tc00.1047053506239.20</a>  | MGRGYSNSRS KSARPTLRMK | hypothetical protein,<br>conserved                | 0.9119683 |
| <a href="#">Tc00.1047053506177.10</a>  | MGRGYSNSRS KSARPTLRMK | hypothetical protein,<br>conserved                | 0.9119683 |
